Development 134, 4507 (2007) doi:10.1242/dev.017343

*folded gastrulation*, cell shape change and the control of myosin localization

**Rachel E. Dawes-Hoang, Kush M. Parmar, Audrey E. Christiansen, Chris B. Phelps, Andrea H. Brand and Eric F. Wieschaus**

There was an error published in *Development* **132**, 4165-4178.

An acceptance date in 2006 was mistakenly listed. The acceptance date should have read 13 June 2005.

We apologise to the authors and readers for this mistake.
